# Supplementary material for: Overexpression of iASPP is required for autophagy in response to oxidative stress in choriocarcinoma
Source: PubMed Central journal article supplement (PMC6792270; doi:10.1186/s12885-019-6206-z), 2019-10-15
Supplement: 12885_2019_6206_MOESM1_ESM.pdf [file 12885_2019_6206_MOESM1_ESM.pdf]

| Case no | Diagnosis | Regress (1);<br>Progress (2) | Metastasis | Average iAspp<br>score | Average LC3B<br>score |
|---------|-----------|------------------------------|------------|------------------------|-----------------------|
| 1       | HM        | n.a.                         | n.a.       | 0.930856               | 0.759062              |
| 2       | HM        | n.a.                         | n.a.       | 0.874093               | 0.529198              |
| 3       | HM        | n.a.                         | n.a.       | 0.831175               | 0.416546              |
| 4       | HM        | 1                            | 1          | 0.891034               | 0.765213              |
| 5       | HM        | 1                            | 1          | 0.890321               | 0.815747              |
| 6       | HM        | n.a.                         | n.a.       | 0.816655               | 0.547529              |
| 7       | HM        | n.a.                         | n.a.       | 0.736066               | 0.585588              |
| 8       | HM        | n.a.                         | n.a.       | 0.921361               | 0.845401              |
| 9       | HM        | n.a.                         | n.a.       | 0.819149               | 0.673977              |
| 10      | HM        | n.a.                         | n.a.       | 0.793870               | 0.597205              |
| 11      | HM        | n.a.                         | n.a.       | 0.712830               | 0.731104              |
| 12      | HM        | n.a.                         | n.a.       | 0.767316               | 0.505537              |
| 13      | HM        | n.a.                         | n.a.       | 0.720601               | 0.612745              |
| 14      | HM        | 1                            | 1          | 0.899673               | 0.880954              |
| 15      | HM        | n.a.                         | n.a.       | 0.944275               | 0.710757              |
| 16      | HM        | n.a.                         | n.a.       | 0.824266               | 0.818044              |
| 17      | HM        | n.a.                         | n.a.       | 0.848876               | 0.797085              |
| 18      | HM        | n.a.                         | n.a.       | 0.901833               | 0.737744              |
| 19      | HM        | n.a.                         | n.a.       | 0.940994               | 0.529192              |
| 20      | HM        | n.a.                         | n.a.       | 0.836106               | 0.732885              |
| 21      | HM        | 1                            | 1          | 0.900076               | 0.740864              |
| 22      | HM        | 1                            | 1          | 0.900509               | 0.838369              |
| 23      | HM        | 1                            | 1          | 0.920642               | 0.812325              |
| 24      | HM        | 2                            | 2          | 0.840429               | 0.854675              |
| 25      | HM        | 2                            | 1          | 0.814554               | 0.815823              |
| 26      | HM        | 1                            | 1          | 0.859252               | 0.847136              |
| 27      | HM        | 1                            | 1          | 0.832148               | 0.768838              |
| 28      | HM        | 1                            | 1          | 0.889190               | 0.932620              |
| 29      | HM        | n.a.                         | n.a.       | 0.977910               | 0.946788              |
| 30      | HM        | n.a.                         | n.a.       | 0.954856               | 0.959546              |
| 31      | HM        | 2                            | 1          | 0.906612               | 0.932714              |
| 32      | HM        | 1                            | 1          | 0.877684               | 0.771339              |
| 33      | HM        | 1                            | 1          | 0.888272               | 0.929007              |
| 34      | HM        | 1                            | 1          | 0.881902               | 0.790188              |
| 35      | HM        | 1                            | 1          | 0.872151               | 0.883322              |
| 36      | HM        | n.a.                         | n.a.       | 0.830953               | 0.944982              |
| 37      | HM        | n.a.                         | n.a.       | 0.840840               | 0.868133              |
| 38      | HM        | 1                            | 1          | 0.870134               | 0.659038              |
| 39      | HM        | 1                            | 1          | 0.729137               | 0.659687              |
| 40      | HM        | 1                            | 1          | 0.947475               | 0.873975              |
| 41      | HM        | 1                            | 1          | 0.924436               | 0.841637              |
| 42      | HM        | 2                            | 2          | 0.873383               | 0.766947              |
| 43      | HM        | 2                            | 1          | 0.973458               | 0.721662              |
| 44      | HM        | 2                            | 1          | 0.920924               | 0.756897              |
| 45      | HM        | 1                            | 1          | 0.961956               | 0.803279              |

|    |    |      |      |          |          |
|----|----|------|------|----------|----------|
| 46 | HM | 1    | 1    | 0.960186 | 0.850244 |
| 47 | HM | 1    | 1    | 0.943407 | 0.822814 |
| 48 | HM | 2    | 1    | 0.968043 | 0.837464 |
| 49 | HM | 2    | 1    | 0.925828 | 0.637234 |
| 50 | HM | 2    | 2    | 0.961358 | 0.855461 |
| 51 | HM | 1    | 1    | 0.868659 | 0.694788 |
| 52 | HM | 2    | 1    | 0.965135 | 0.898219 |
| 53 | HM | 1    | 1    | 0.949995 | 0.623895 |
| 54 | HM | 2    | 2    | 0.908073 | 0.788455 |
| 55 | HM | 2    | 1    | 0.861395 | 0.782556 |
| 56 | HM | 1    | 1    | 0.900272 | 0.833110 |
| 57 | HM | 1    | 1    | 0.924922 | 0.814877 |
| 58 | HM | 1    | 1    | 0.902200 | 0.819352 |
| 59 | HM | 1    | 1    | 0.930116 | 0.872989 |
| 60 | HM | 1    | 1    | 0.767185 | 0.788629 |
| 61 | HM | n.a. | n.a. | 0.856247 | 0.786474 |
| 62 | HM | 2    | 1    | 0.917523 | 0.827793 |
| 63 | HM | n.a. | n.a. | 0.866158 | 0.738178 |

n.a. not available

#### Normal placenta and choriocarcinoma

| Case no | Diagnosis |  | Average iAspp score | Average LC3B score |
|---------|-----------|--|---------------------|--------------------|
| 1       | Term      |  | 0.686320            | 0.611711           |
| 2       | Term      |  | 0.735378            | 0.588255           |
| 3       | Term      |  | 0.817650            | 0.833008           |
| 4       | Term      |  | 0.729566            | 0.892091           |
| 5       | Term      |  | 0.841093            | 0.713212           |
| 6       | Term      |  | 0.646102            | 0.683173           |
| 7       | Term      |  | 0.744603            | 0.842802           |
| 8       | Term      |  | 0.878177            | 0.885737           |
| 9       | Term      |  | 0.835083            | 0.880291           |
| 10      | Term      |  | 0.810633            | 0.814179           |
| 11      | Term      |  | 0.853359            | 0.687227           |
| 12      | 1st       |  | 0.773019            | 0.674726           |
| 13      | 1st       |  | 0.891208            | 0.664781           |
| 14      | 1st       |  | 0.913384            | 0.620295           |
| 15      | 1st       |  | 0.782955            | 0.576681           |
| 16      | 1st       |  | 0.929519            | 0.863757           |
| 17      | 1st       |  | 0.837406            | 0.712281           |
| 18      | 1st       |  | 0.886375            | 0.652149           |
| 19      | 1st       |  | 0.791320            | 0.418343           |
| 20      | 1st       |  | 0.755834            | 0.526463           |
| 21      | 1st       |  | 0.892049            | 0.632831           |
| 22      | CCA       |  | 0.998871            | n.d.               |
| 23      | CCA       |  | 0.779285            | n.d.               |
| 24      | CCA       |  | 0.926275            | n.d.               |
| 25      | CCA       |  | 0.378917            | n.d.               |

|      |                |  |  |          |      |
|------|----------------|--|--|----------|------|
| 26   | CCA            |  |  | 0.543351 | n.d. |
| 27   | CCA            |  |  | 0.972303 | n.d. |
| 28   | CCA            |  |  | 0.910740 | n.d. |
| n.d. | not determined |  |  |          |      |
