# Supplementary material for: Overexpression of iASPP is required for autophagy in response to oxidative stress in choriocarcinoma
Source: PubMed Central journal article supplement (PMC6792270; doi:10.1186/s12885-019-6206-z), 2019-10-15
Supplement: 12885_2019_6206_MOESM2_ESM.pdf [file 12885_2019_6206_MOESM2_ESM.pdf]

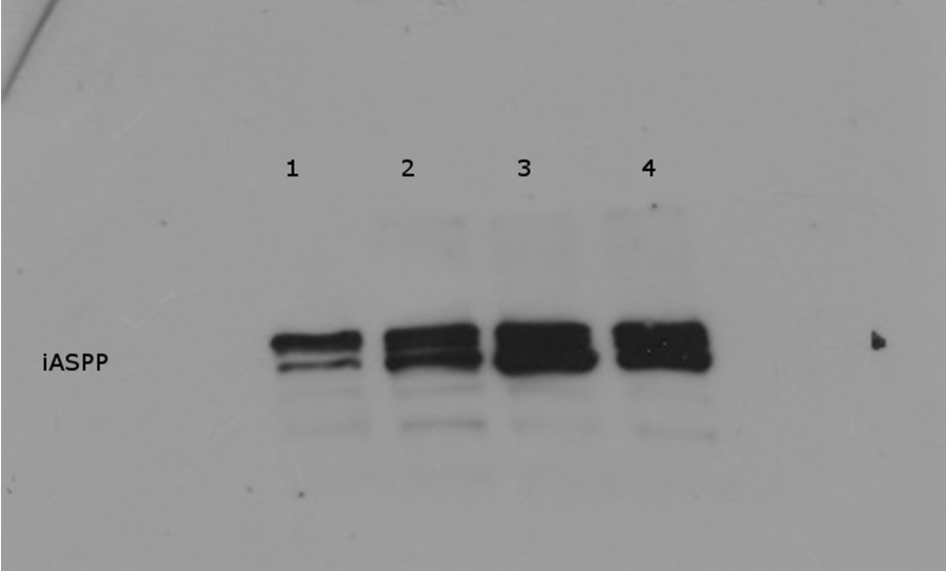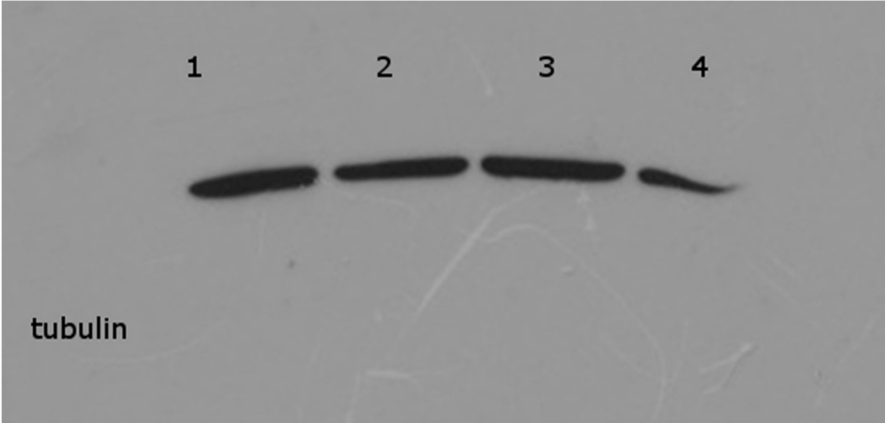

Figure 1C. Lane 1-HTR, Lane 2-BeWo, Lane 3-JEG-3, Lane 4-JAR

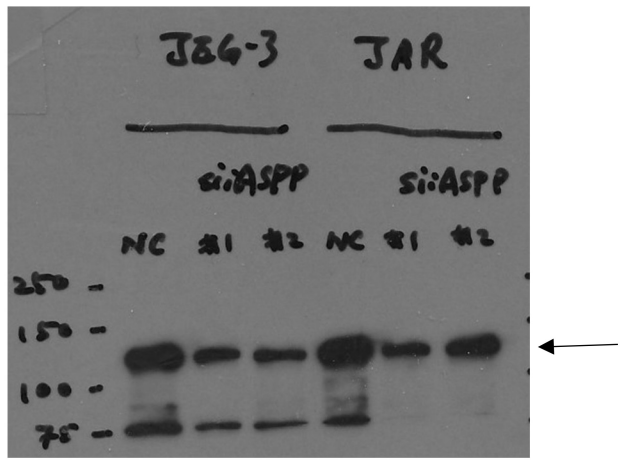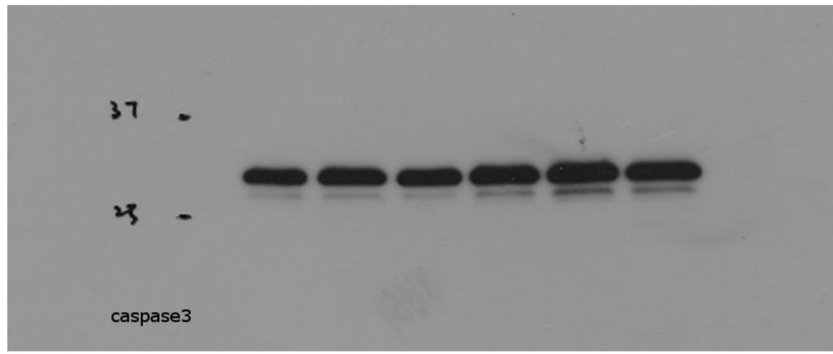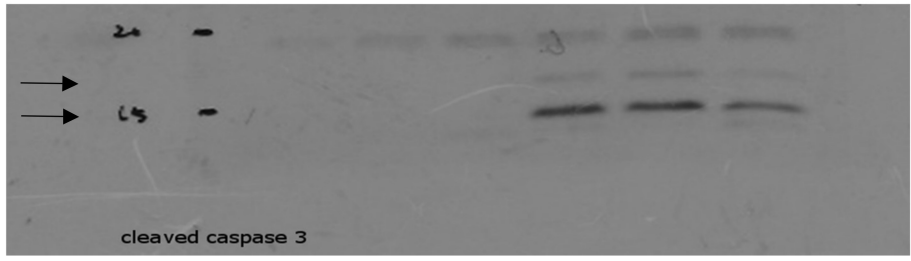

Figure 2D

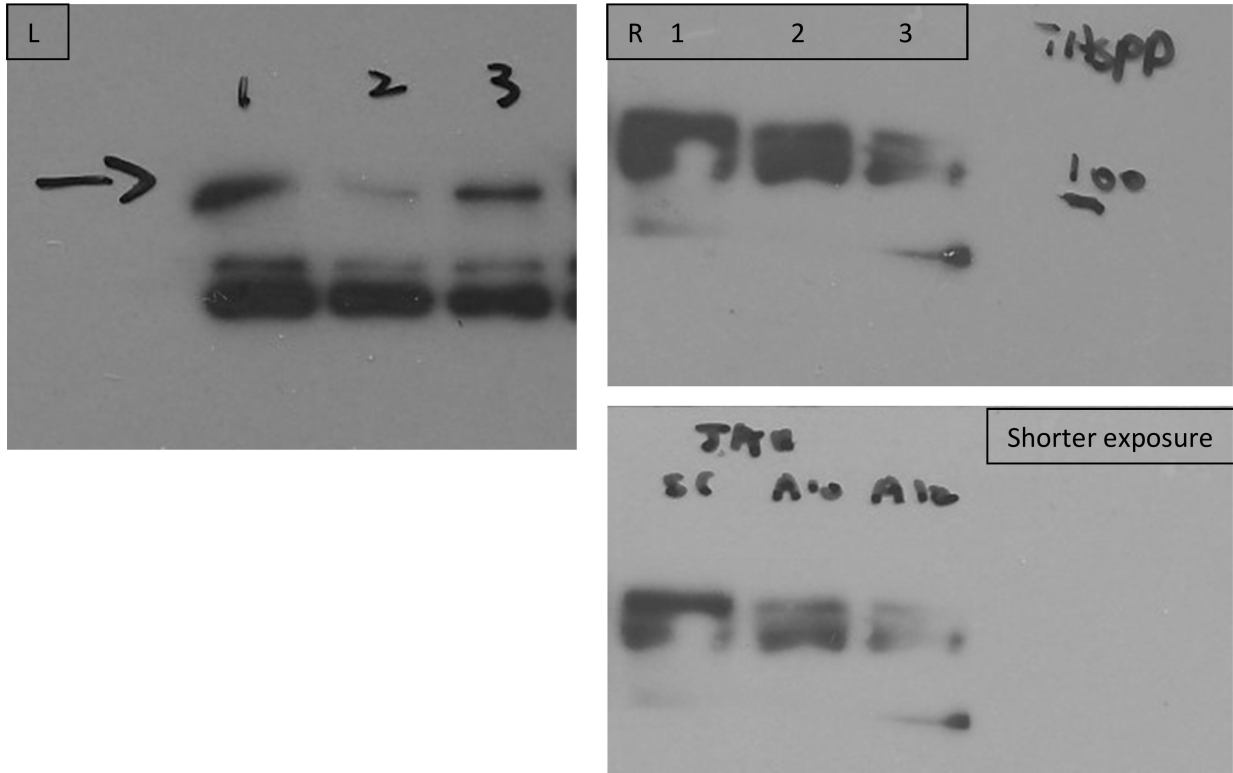

Figure 3D. (L) JEG-3 cells. (R) JAR cells. 1-si, 2-siaspp#1, 3-siaspp#2.

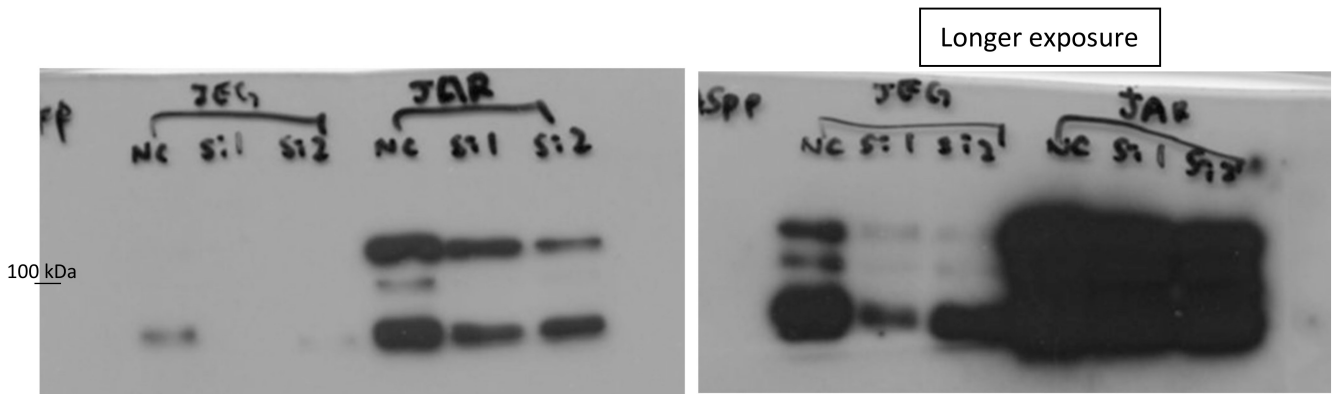

Figure 4C
